# Supplementary material for: Effect of Michael adduction on peptide preservation in natural waters
Source: Royal Society of Chemistry journal article supplement (doi:10.1039/c4em00075g), 2014-06-03
Supplement: c4em00075g1.pdf [file c4em00075g1.pdf]

SI Fig. 1 Results of analysis of the synthesised AFRV by (a) NMR and (b) FT-ICR-MS in positive ion mode.

SI Fig. 2 Results of analysis of the synthesised AREG by (a) NMR and (b) FT-ICR-MS in positive ion mode.

SI Fig 3 Results of analysis of the synthesised AVFA by (a) NMR and (b) FT-ICR-MS in positive ion mode.

SI Fig. 4 Results of analysis of the synthesised 1, 4-naphthoquinon-2-yl-AFRV (Nap-AFRV) by (a) NMR and (b) FT-ICR-MS in positive ion mode.

SI Fig. 5 Results of analysis of the synthesised Nap-AREG by (a) NMR and (b) FT-ICR-MS in positive ion mode.

SI Fig 6 Results of analysis of the synthesised Nap-AVFA by (a) NMR and (b) FT-ICR-MS in positive ion mode.
